# Supplementary material
Source: publisher figshare collection journal article supplement (https://acs.figshare.com/ndownloader/files/3716209)
Supplement: Supplementary file 1 [file 3716209]

## Supporting Figure S1

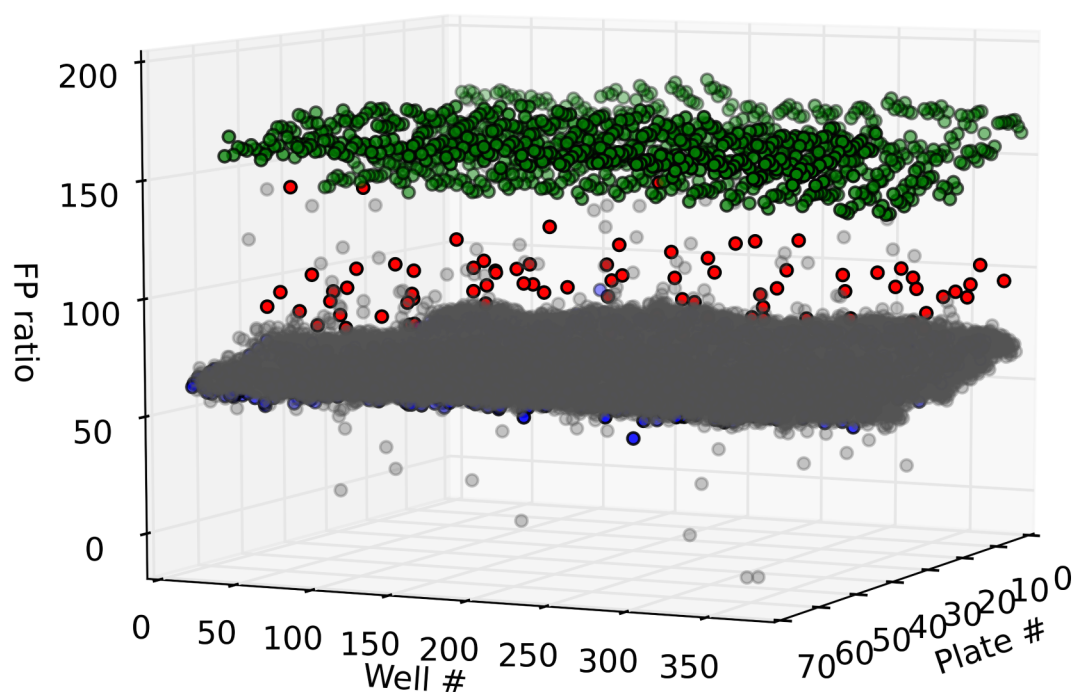

**Supporting Figure 1.** FP ratio for each well in the high throughput screen of the ChemDiv library. The wells contain phosphorylated Rb<sup>NP</sup> and compounds (grey circles), phosphorylated Rb<sup>NP</sup> and DMSO (blue circles, “negative control”), or unphosphorylated Rb<sup>NP</sup> (green circles, “positive control”). The red circles are hits that increase the FP ratio of E2F<sup>TMR</sup> in the presence of phosphorylated Rb<sup>NP</sup> and satisfy our total fluorescence criterion.

Supporting Figure S2

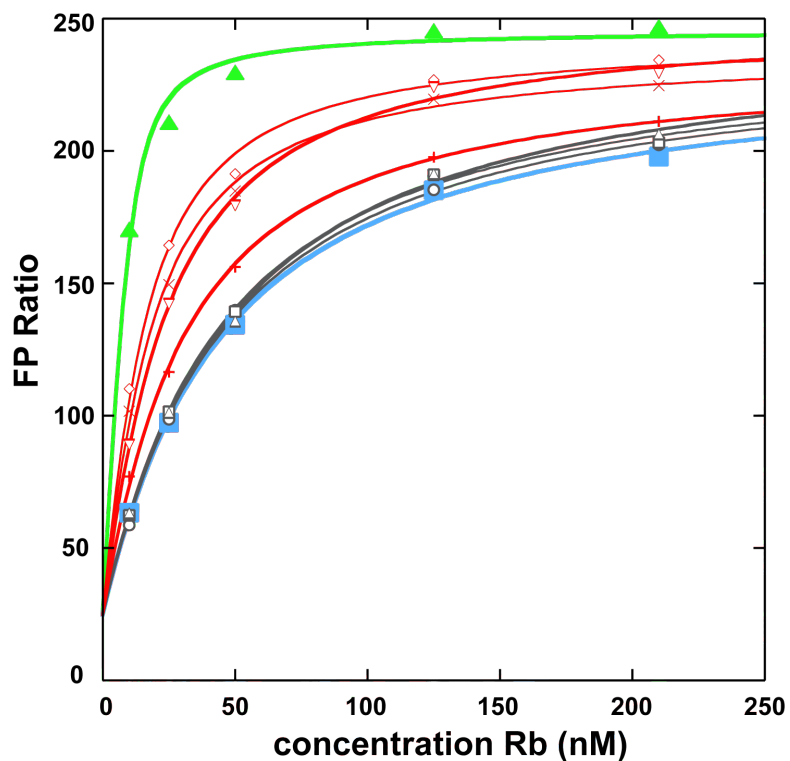

|                                                  |                                   | E2F <sup>TMR</sup> K <sub>d</sub> (nM) |
|--------------------------------------------------|-----------------------------------|----------------------------------------|
| ▲                                                | unphosphorylated Rb <sup>NP</sup> | 2.2 ± 0.6                              |
| ■                                                | phosphorylated Rb <sup>NP</sup>   | 42 ± 3                                 |
| phosphorylated Rb <sup>NP</sup> + hit compound # |                                   |                                        |
| ○                                                | 23                                | 40 ± 2                                 |
| □                                                | 41                                | 39 ± 3                                 |
| ▽                                                | 67                                | 19 ± 1                                 |
| ◇                                                | 68                                | 11 ± 1                                 |
| △                                                | 69                                | 39 ± 3                                 |
| +                                                | 70                                | 26 ± 2                                 |
| ×                                                | 72                                | 13 ± 1                                 |

**Supporting Figure 2.** Effect of validated primary screen hits in a complete Rb<sup>NP</sup> protein titration. FP ratios were measured and K<sub>d</sub> values for E2F<sup>TMR</sup>-Rb<sup>NP</sup> binding were determined as in Figure 3a.

## Supporting Figure S3

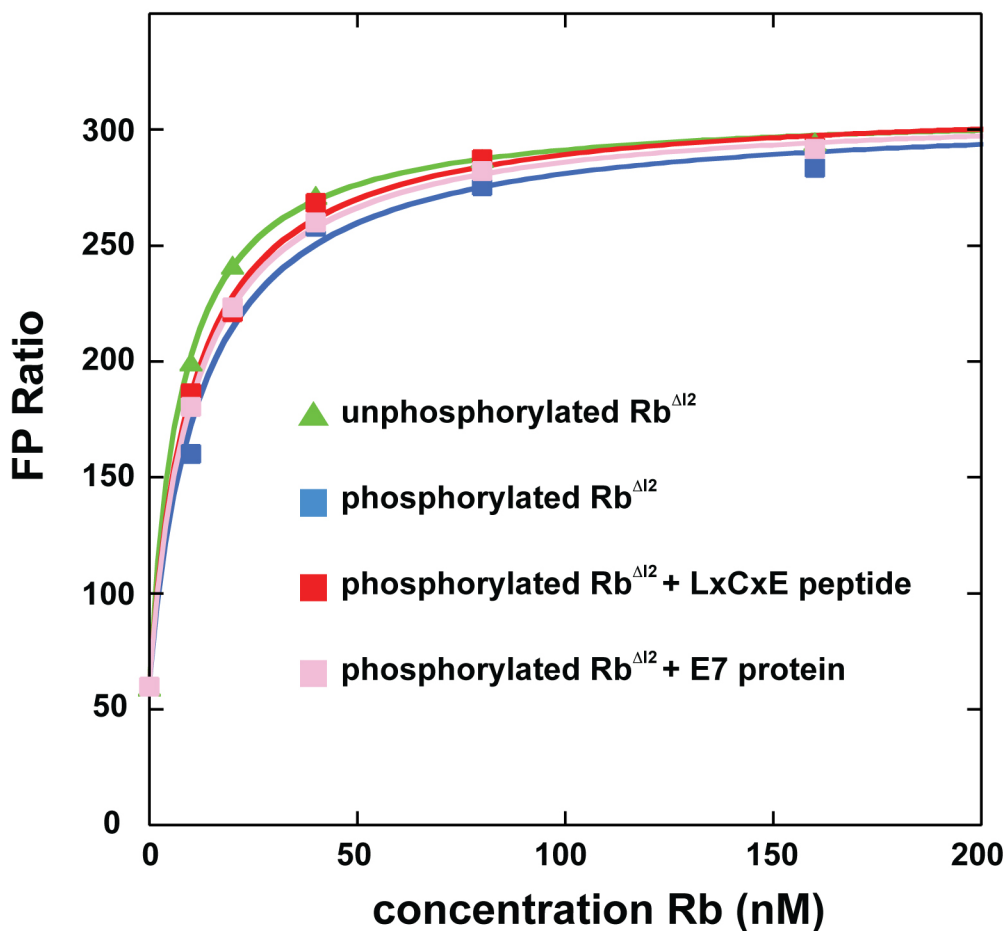

**Supporting Figure 3.** The LxCxE peptide and E7 protein activators do not affect E2F binding to an Rb mutant in which interdomain docking is disrupted. Binding measurements are shown of E2F<sup>TMR</sup> to an Rb<sup>NP</sup> construct containing Q736A and K740A mutations (Rb<sup>ΔI2</sup>). As described previously<sup>14</sup>, E2F binding to the unphosphorylated ( $K_d = 7.5 \pm 0.3$  nM) and phosphorylated ( $K_d = 12 \pm 2$  nM) mutant are similar. Addition of 2  $\mu$ M LxCxE peptide ( $K_d = 10 \pm 1$  nM) or E7 protein ( $K_d = 10.5 \pm 0.3$  nM) does not increase E2F affinity, indicating that the activating effect is not independent of interdomain docking. We confirmed using ITC that the LxCxE peptide still binds Rb<sup>ΔI2</sup> with  $K_d = 180 \pm 20$  nM.

## Supporting Figure S4

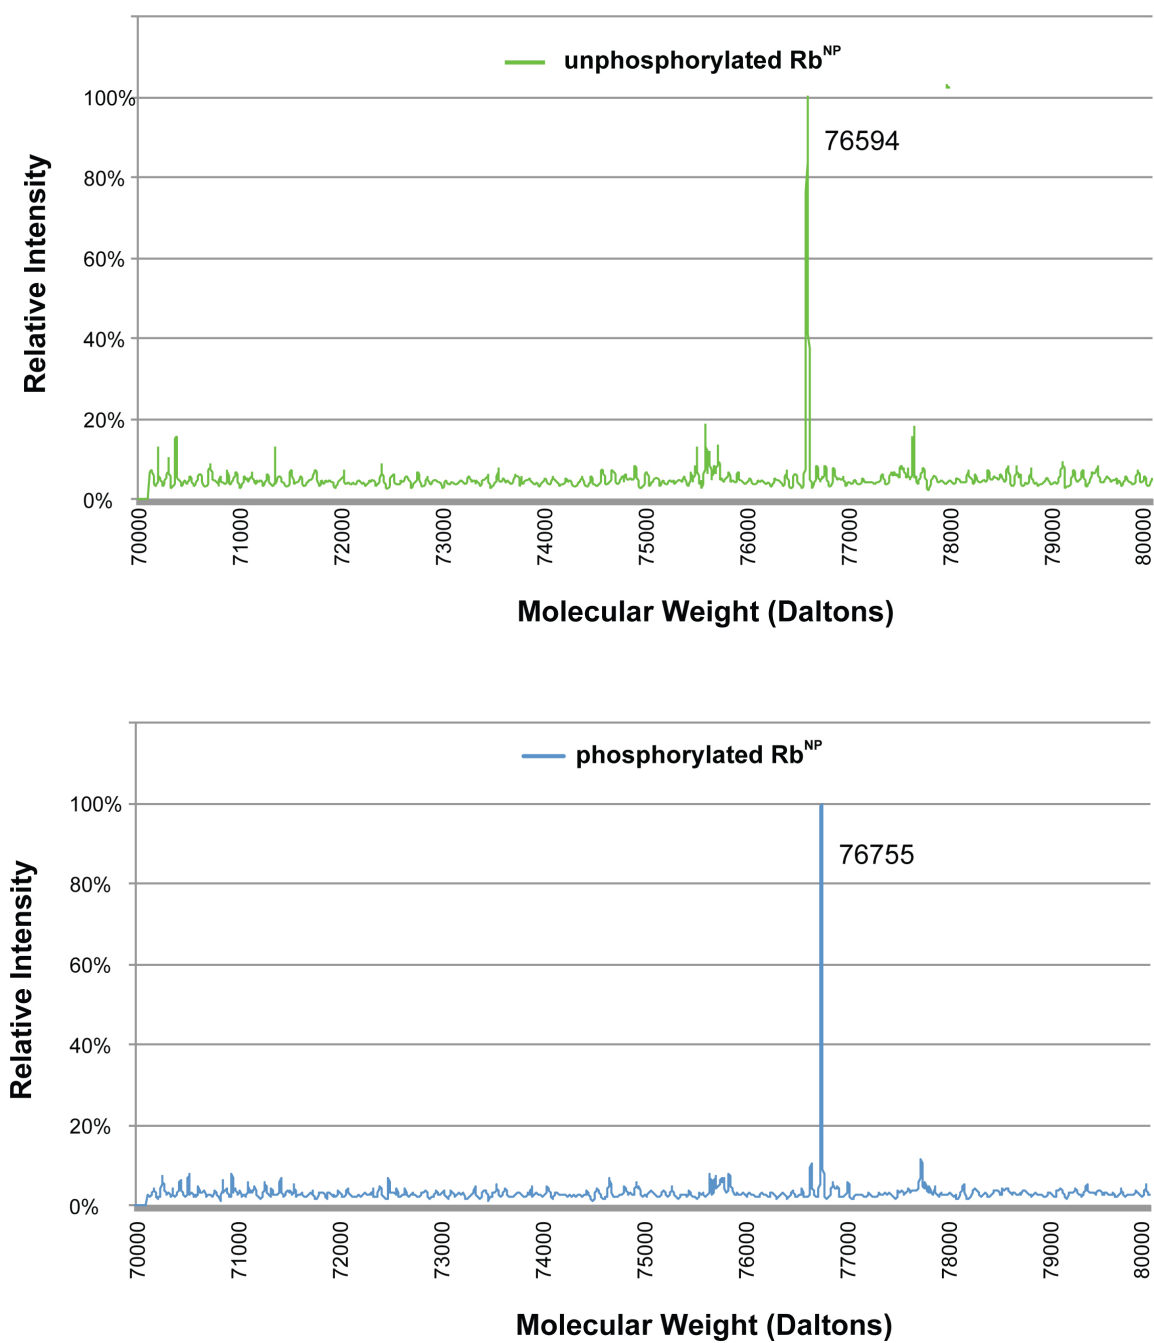

**Supporting Figure 4.** Electrospray ionization mass spectra of intact samples of unphosphorylated and phosphorylated Rb<sup>NP</sup>. Samples were prepared by desalting. Each spectrum shows a single, dominant peak at the indicated molecular weight. The ~160 Da increase in the phosphorylated sample corresponds to addition of two phosphates.

## Supporting Table

| Structure                                                                           | Hit Compound No. |
|-------------------------------------------------------------------------------------|------------------|
| 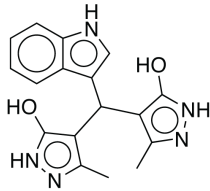   | 23               |
|    | 41               |
|    | 67               |
|   | 68               |
|  | 69               |
|  | 70               |
|  | 72               |

Supporting Table. Structures of validated hits in the primary screen.
